# Supplementary material
Source: publisher figshare collection journal article supplement (https://acs.figshare.com/ndownloader/files/5129662)
Supplement: Supplementary file 1 [file 5129662]

Supporting information 1

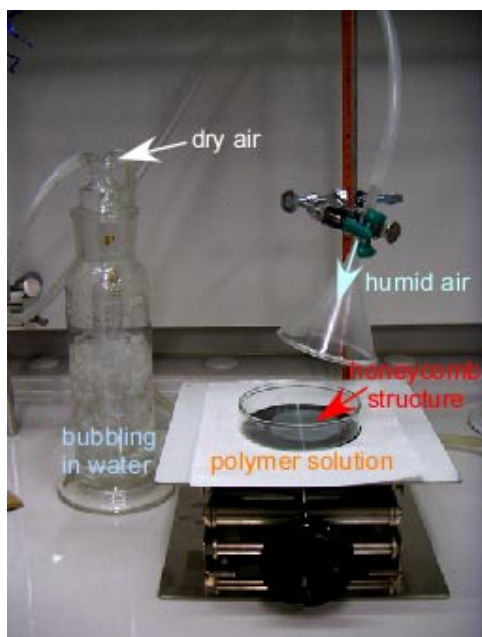

Figure S1: Experimental set up of preparation of honeycomb-patterned films. The experiment was performed under moderate conditions.
